# Supplementary material for: Quinizarin: a large aromatic molecule well suited for atomic layer deposition
Source: Royal Society of Chemistry journal article supplement (doi:10.1039/d1dt00683e), 2021-01-01
Supplement: d1dt00683e1.pdf [file d1dt00683e1.pdf]

## Supplementary information

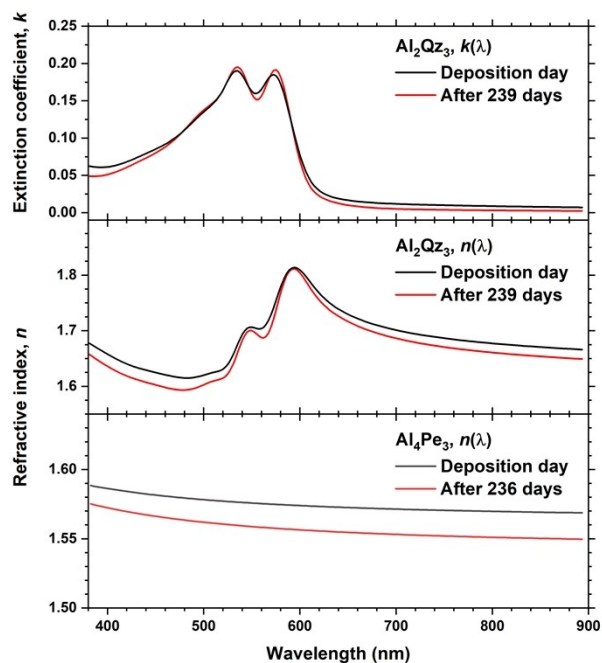

Supplementary figure 1: Ellipsometry modelling of  $\text{Al}_2\text{Qz}_3$  and  $\text{Al}_4\text{Pe}_3$  films on silicon on the day of deposition and after 239 and 236 days, respectively.

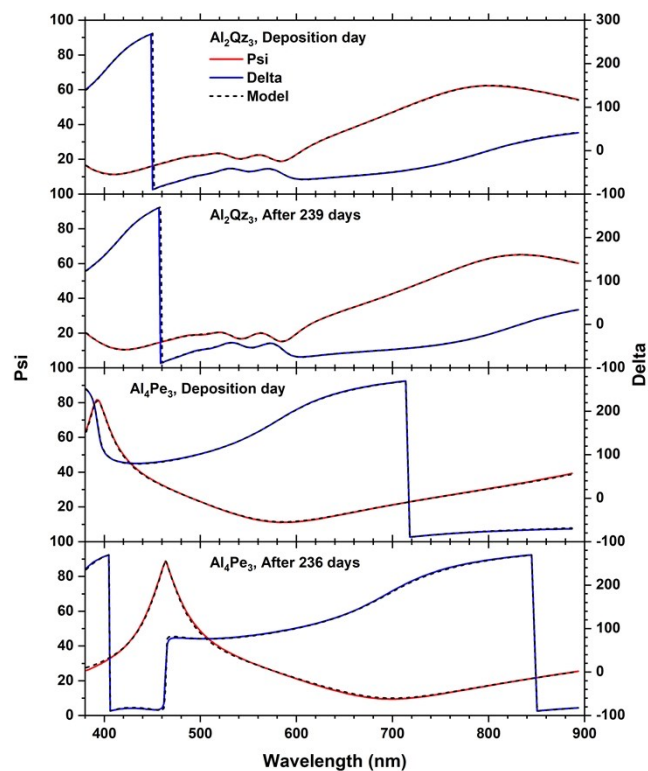

Supplementary figure 2: Ellipsometry general oscillator model fits for the  $\text{Al}_2\text{Qz}_3$  (with 5 gaussian peaks in the visible range) and  $\text{Al}_4\text{Pe}_3$  films on silicon.

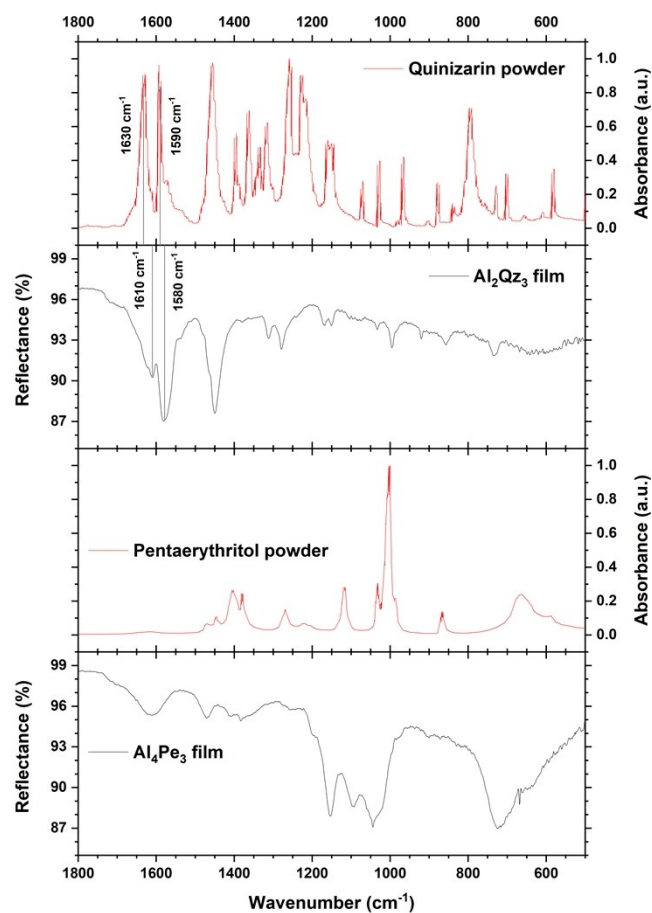

Supplementary figure 3: FTIR data for  $\text{Al}_2\text{Qz}_3$  and  $\text{Al}_4\text{Pe}_3$  films on steel substrate and quinizarin and pentaerythritol in KBr pellet, zoomed in to easier identify peaks. The position of the two strongest carbonyl peaks around  $1600\text{ cm}^{-1}$  is numbered.

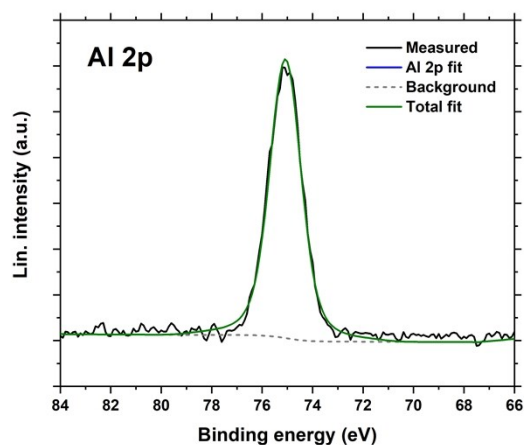

Supplementary figure 5: XPS Al 2p peak.

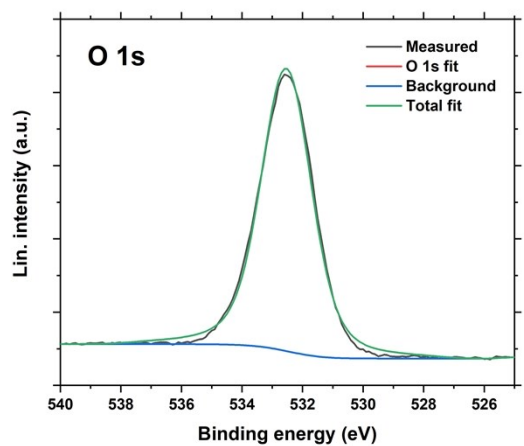

Supplementary figure 6: XPS O 1s peak.

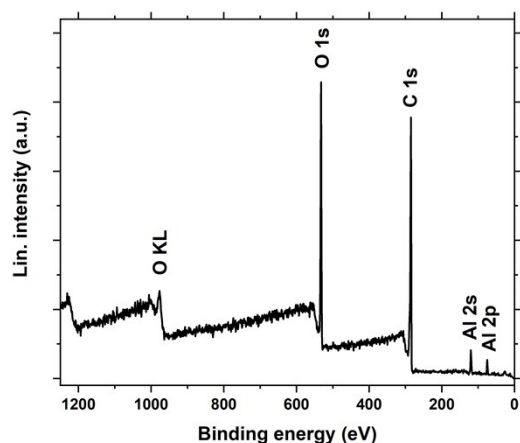

Supplementary figure 4: XPS Survey scan.

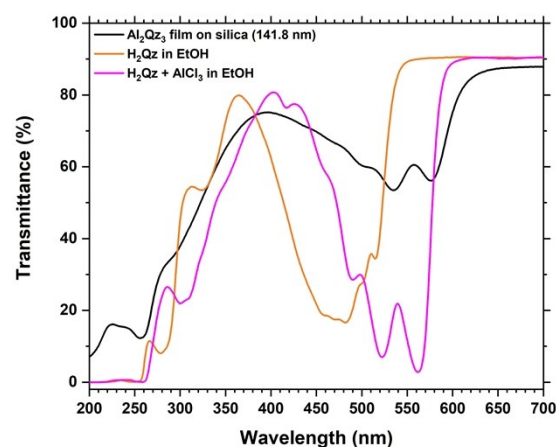

Supplementary figure 7: UV-Vis transmission of an  $\text{Al}_2\text{Qz}_3$  film compared to an ethanolic solution of  $\text{H}_2\text{Qz}$  with and without added  $\text{Al}^{3+}$  from  $\text{AlCl}_3$ .

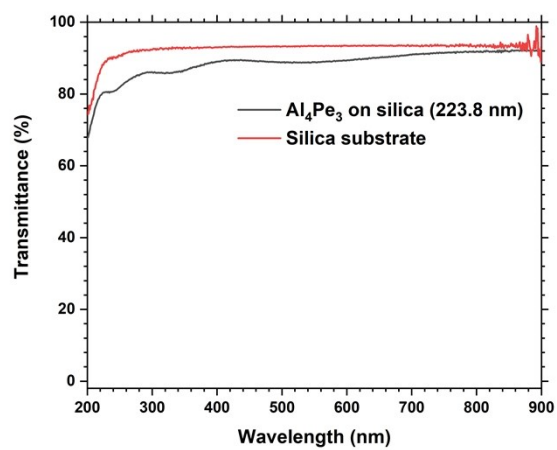

Supplementary figure 8: UV-Vis transmission spectrum of an Al<sub>4</sub>Pe<sub>3</sub> film on silica substrate. The waves seen are interference in the film.
